# Supplementary material for: Switchable release nano-reservoirs for co-delivery of drugs via a facile micelle–hydrogel composite
Source: Royal Society of Chemistry journal article supplement (doi:10.1039/c7tb00701a), 2017-01-01
Supplement: c7tb00701a1.pdf [file c7tb00701a1.pdf]

# Switchable release nano-reservoirs for co-delivery of drugs via a facile micelle-hydrogel composite

Monika Patel<sup>a</sup>, Tatsuo Kaneko<sup>b</sup> and Kazuaki Matsumura<sup>a\*</sup>

<sup>a</sup> Materials Chemistry Area, School of Materials Science,  
Japan Advanced Institute of Science and Technology, 1-1 Asahidai, Nomi, Ishikawa  
923-1292, Japan

<sup>b</sup> Energy and Environment Area, School of Materials Science,  
Japan Advanced Institute of Science and Technology, 1-1 Asahidai, Nomi, Ishikawa  
923-1292, Japan

E-mail: [mkazuaki@jaist.ac.jp](mailto:mkazuaki@jaist.ac.jp)

Ph. : +81-761-51-1680

## Figures

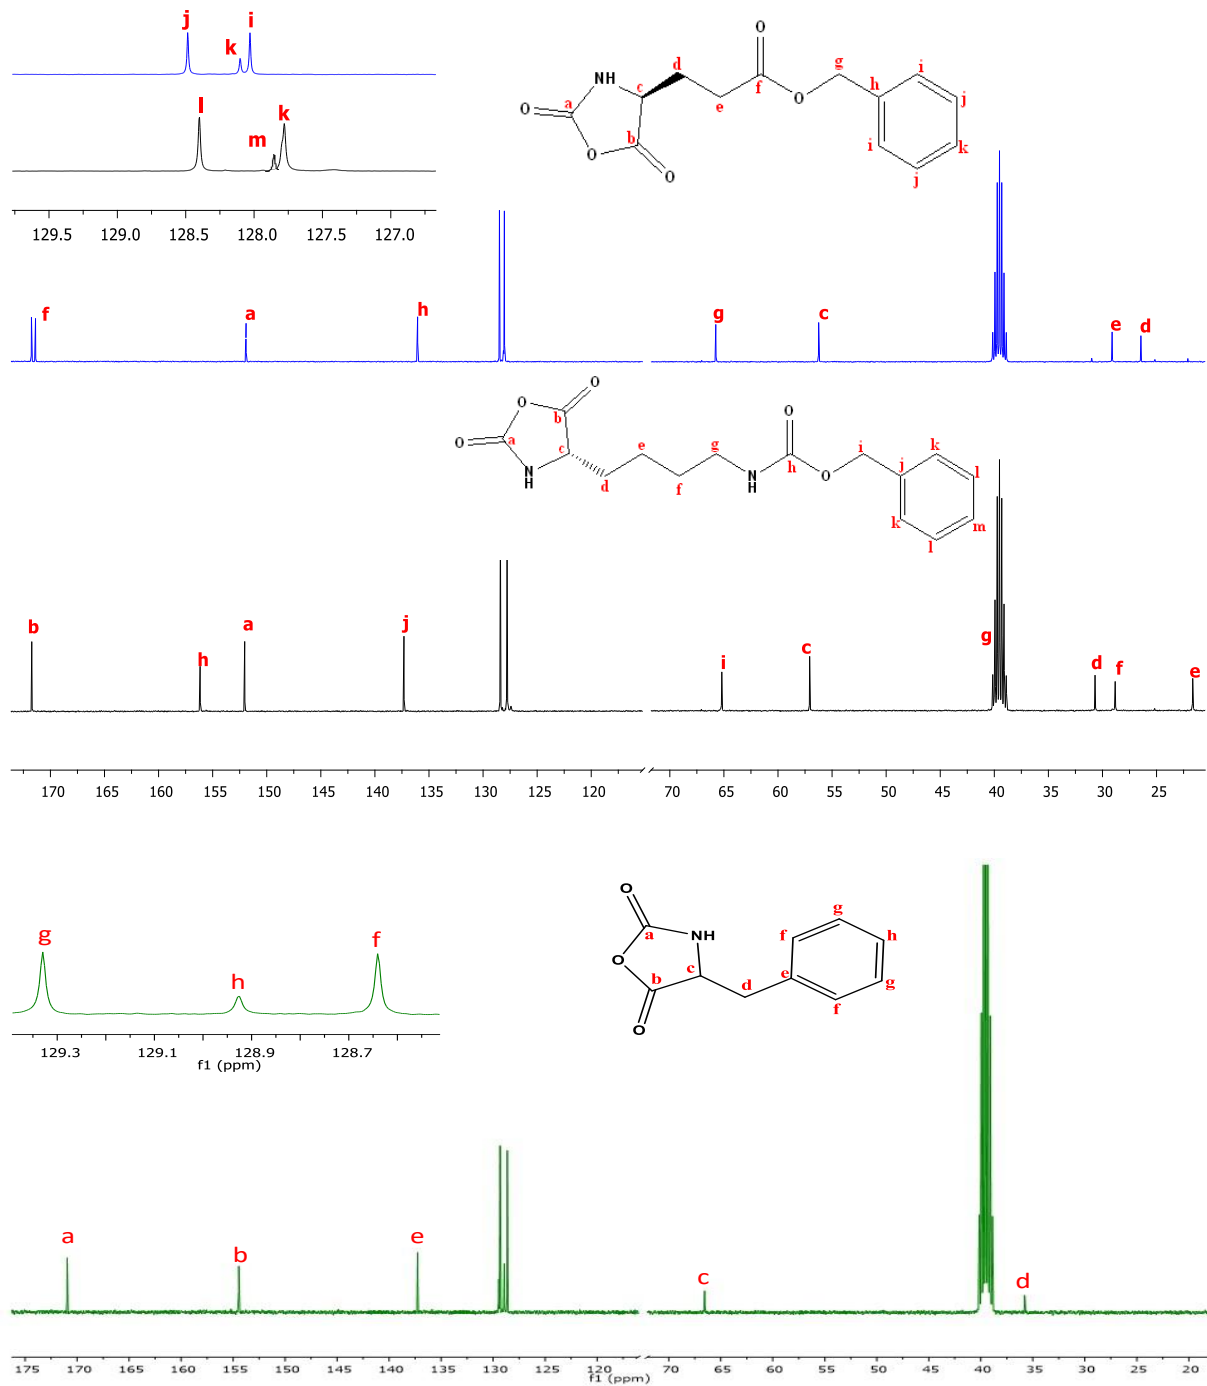

**Figure S1:**  $^{13}\text{C}$  NMR of Glu (OBzl)-NCA [blue]; Lys(Z)-NCA [black] and Phe-NCA [green].

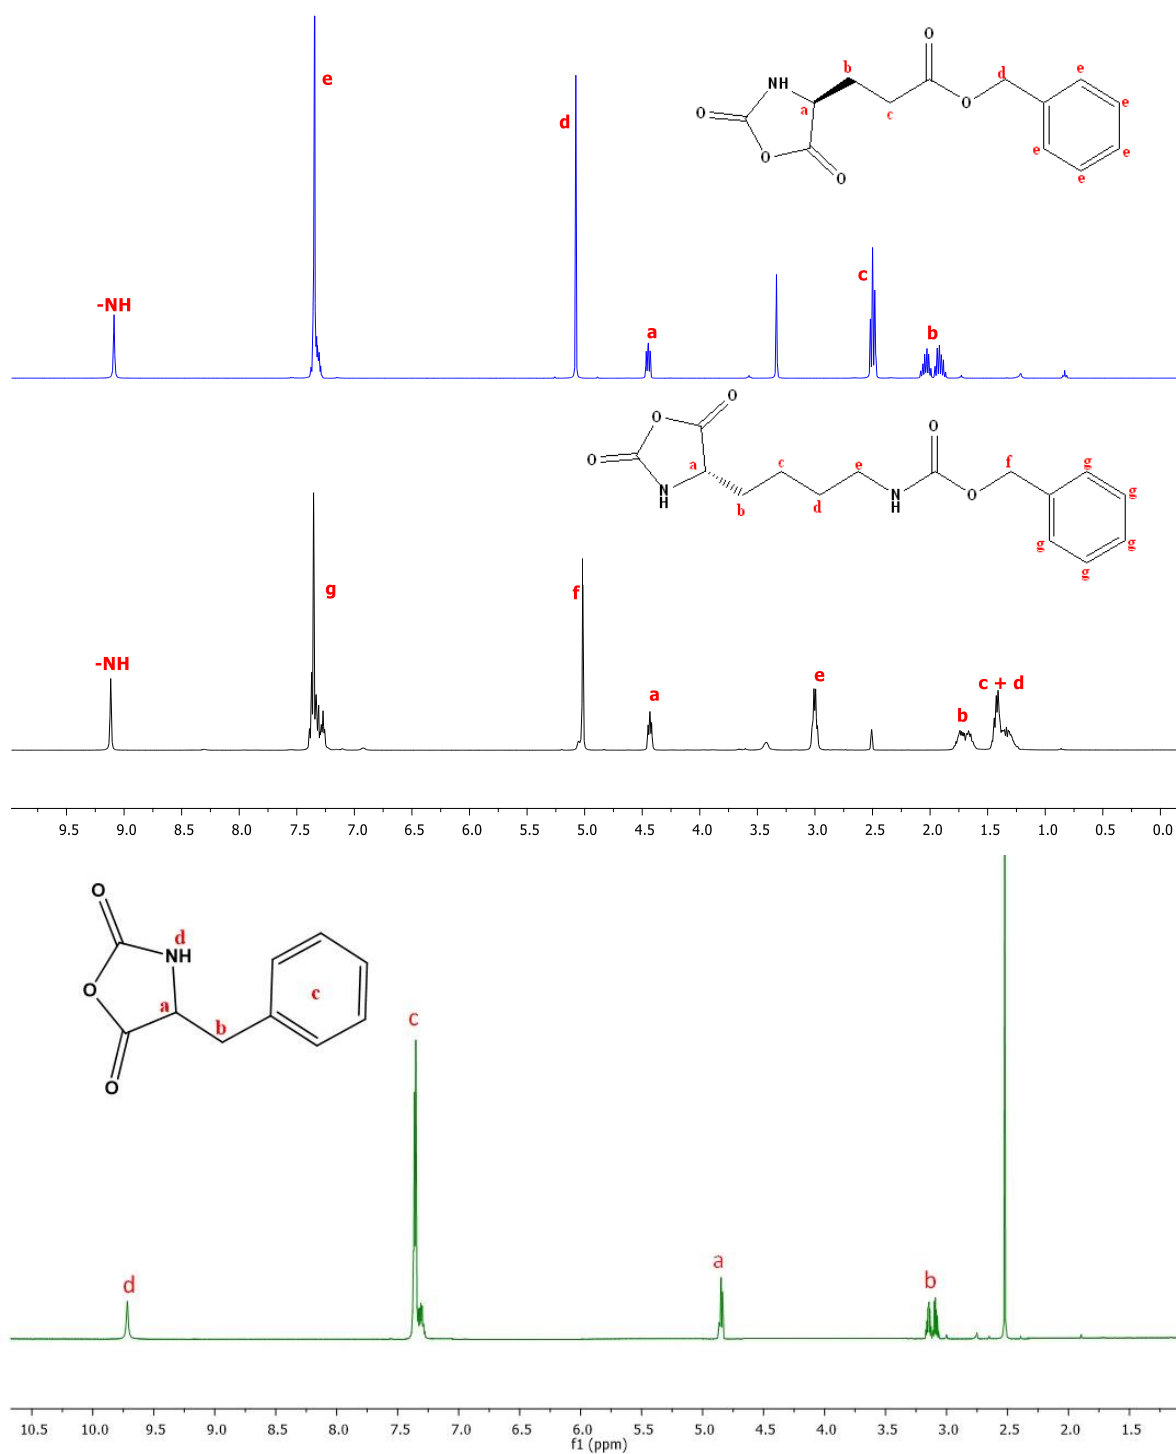

**Figure S2:**  $^1\text{H}$  NMR of Glu (OBzl)-NCA [blue]; Lys(Z)-NCA [black] and Phe-NCA [green].

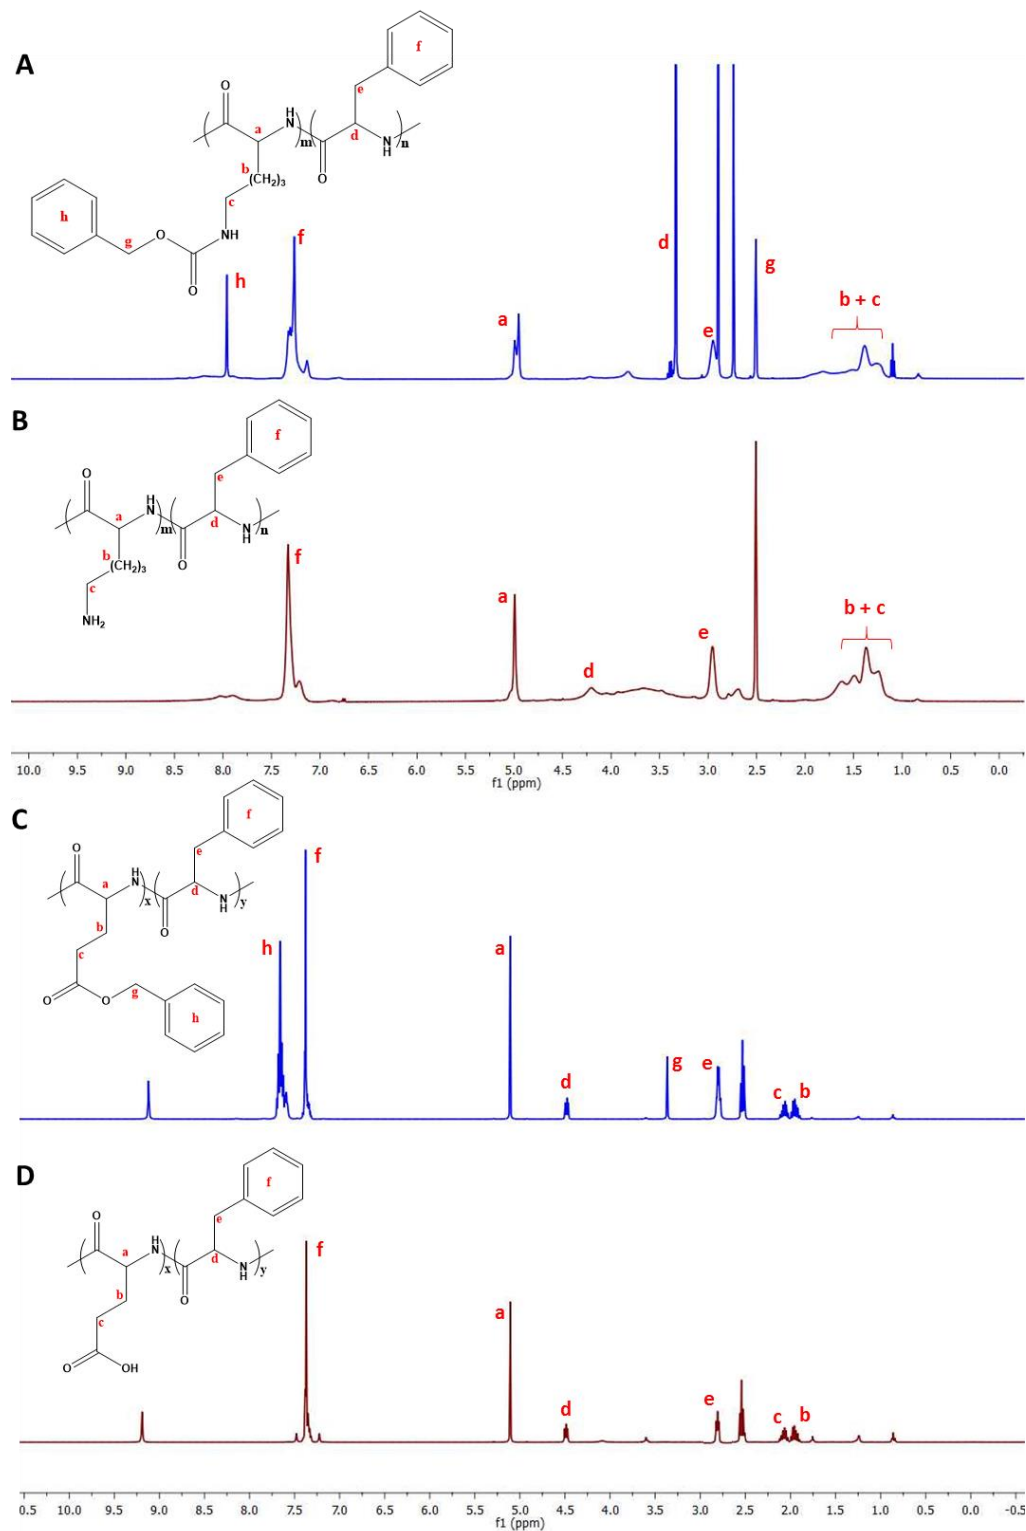

**Figure S3:**  $^1\text{H}$  NMR of synthesized polymers A. PLL-PPA (poly L lysine-b-poly phenylalanine) protected; B. PLL-PPA deprotected; C. PGA-PPA (poly glutamic acid-b-poly phenylalanine) protected and D. PGA-PPA deprotected.

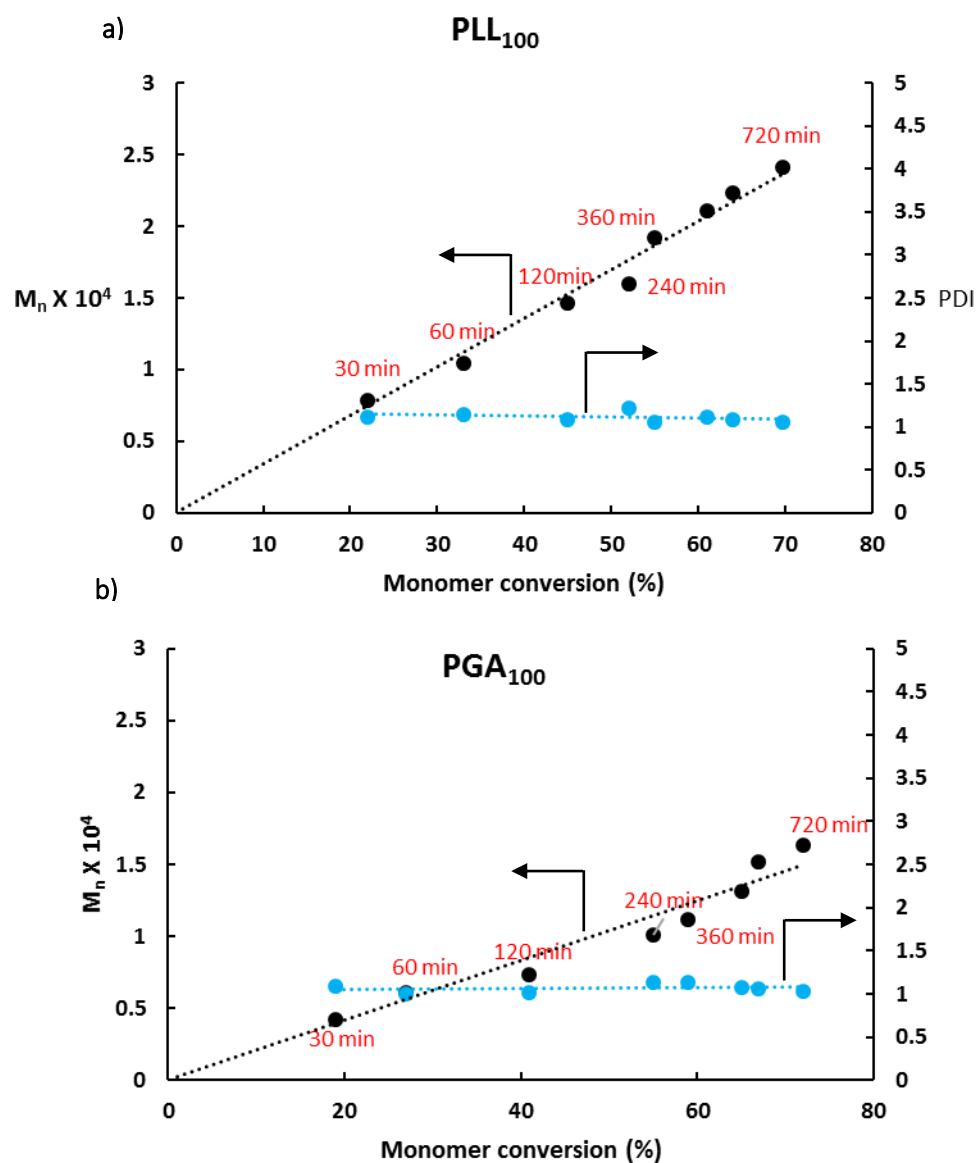

**Figure S4:** Molecular weight ( $M_n$ ) and the PDI as a function of monomer conversion showing the controllability of the polymerization reaction; **a.** PLL block and **b.** PGA block

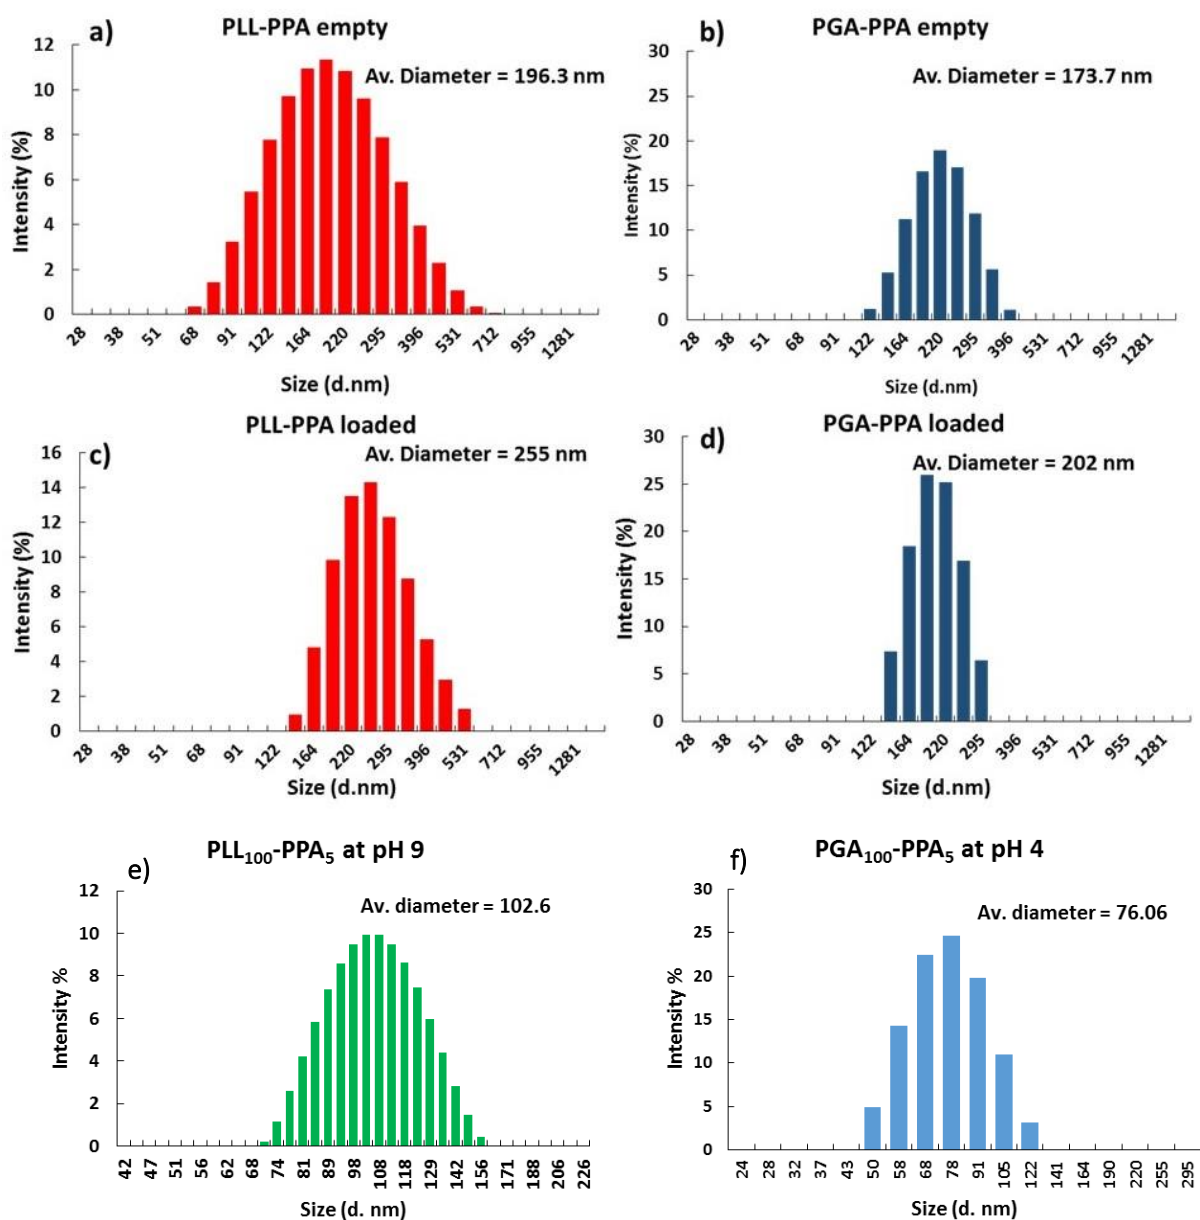

**Figure S5:** Dynamic Light Scattering (DLS) results (a) and (c) show PLL-PPA micelles before and after curcumin loading; (b) and (d) show PGA-PPA micelles before and after loading of amphotericin B; (e) and (f) showing the change in hydrodynamic diameter of PLL<sub>100</sub>-PPA<sub>5</sub> and PGA<sub>100</sub>-PPA<sub>5</sub> at pH 9.0 and 4.0 respectively.

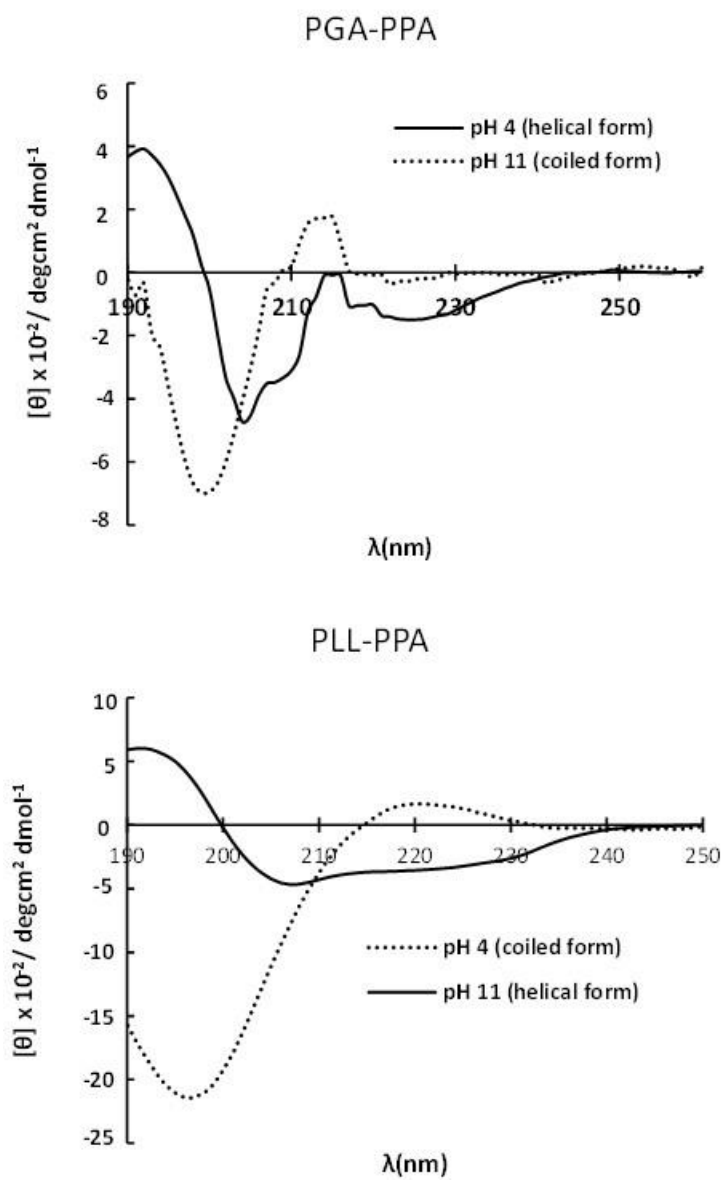

**Figure S6:** CD spectra of PGA-PPA (top) and PLL-PPA (bottom) at pH showing their respective transitions from random coil to  $\alpha$ -helix at change in pH.

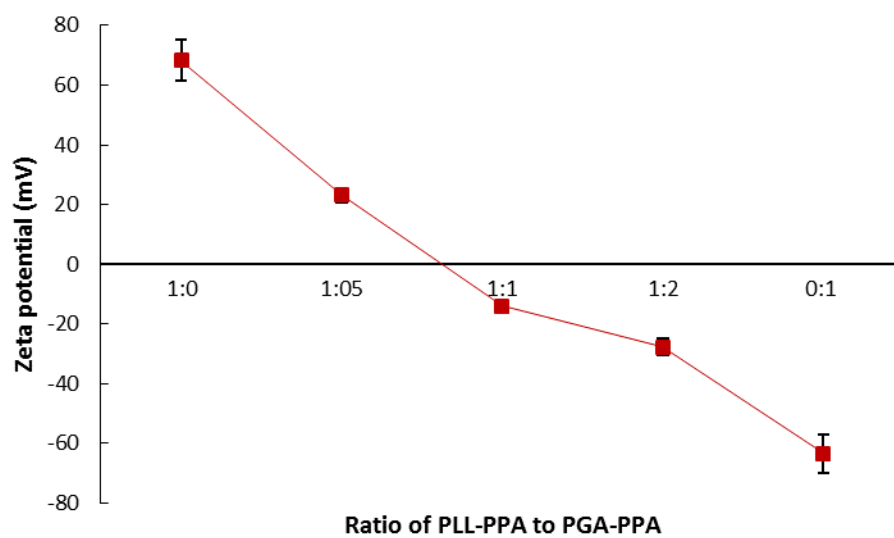

**Figure S7:** Variations in zeta potential of various ratios of PLL-PPA: PGA-PPA micelles.



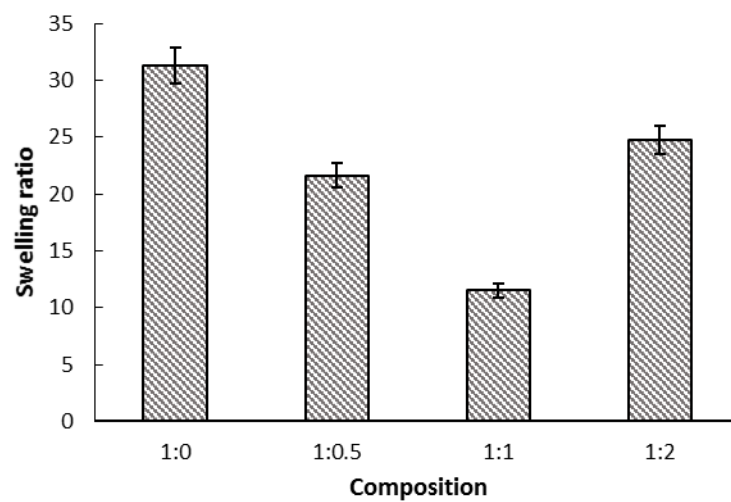

**Figure S8:** The equilibrium swelling ratios of the composites with varying ratios of PLL-PPA: PGA-PPA. (n=3)
